# Supplementary material for: Language Brain Representation in Bilinguals With Different Age of Appropriation and Proficiency of the Second Language: A Meta-Analysis of Functional Imaging Studies
Source: PubMed Central journal article supplement (PMC6537025; doi:10.3389/fnhum.2019.00154), 2019-05-21
Supplement: Data_Sheet_1.pdf [file Data_Sheet_1.pdf]

## Supplementary Material

**Supplementary Table S1.** List of all the studies included in the meta-analyses.

| <b>Authors</b>    | <b>Year</b> | <b>L1</b>                                         | <b>L2</b>                                  | <b>L2 AoA</b>                                                                                         | <b>L2 proficiency</b>          | <b>Technique</b> | <b>Task</b>                                                    |
|-------------------|-------------|---------------------------------------------------|--------------------------------------------|-------------------------------------------------------------------------------------------------------|--------------------------------|------------------|----------------------------------------------------------------|
| *Berken et al.    | 2015        | French (also English for simultaneous bilinguals) | English (for sequential bilinguals)        | From birth, for simultaneous bilinguals;<br>13.9 (5.0), for sequential bilinguals                     | High                           | fMRI             | Sentence reading                                               |
| *Buchweitz et al. | 2012        | Portuguese                                        | English                                    | 13.08 (3.1; range: 10-22)                                                                             | High                           | fMRI             | Inner speech production from different semantic category items |
| Callan et al.     | 2014        | Japanese                                          | English                                    | At junior high school                                                                                 | Scholastic education           | fMRI             | Phoneme identification                                         |
| Callan et al.     | 2004        | Japanese                                          | English                                    | At junior high school                                                                                 | Scholastic education           | fMRI             | Phoneme identification                                         |
| Cao et al.        | 2014        | Chinese                                           | English                                    | 11.7 (range: 9-13)                                                                                    | Varying                        | fMRI             | Word reading with rhyming judgment                             |
| Cao et al.        | 2013        | Chinese                                           | English                                    | 11.7 (range: 9-13)                                                                                    | Varying                        | fMRI             | Word reading with rhyming judgment                             |
| Chan et al.       | 2008        | Chinese                                           | English                                    | Range: 3-5                                                                                            | Significantly inferior than L1 | fMRI             | Lexical decision                                               |
| *Chee et al.      | 2001        | English for Singaporeans; Mandarin for PRC        | Mandarin for Singaporeans; English for PRC | At or before 5                                                                                        | High                           | fMRI             | Semantic association between words or characters               |
| *Chee et al.      | 2000        | Chinese                                           | English                                    | At or before 5                                                                                        | High                           | fMRI             | Semantic association between characters                        |
| *Das et al.       | 2011        | Hindi (also English for simultaneous bilinguals)  | English (for sequential bilinguals)        | From birth for simultaneous bilinguals;<br>late (reading started at 10),<br>for sequential bilinguals | Good                           | fMRI             | Word reading                                                   |

|                       |       |                                            |                                     |                                                                 |                                                    |      |                                                                                    |
|-----------------------|-------|--------------------------------------------|-------------------------------------|-----------------------------------------------------------------|----------------------------------------------------|------|------------------------------------------------------------------------------------|
| *De Bleser et al.     | 2003  | Dutch or a Flemish dialect                 | French                              | At 10                                                           | From good to very good                             | PET  | Picture naming                                                                     |
| *Ding et al.          | 2003  | Chinese                                    | English                             | 12.17 (range: 11-13)                                            | High                                               | fMRI | Word reading by paying attention to word font or by making semantic categorization |
| Feng et al.           | 2015  | Chinese                                    | English                             | 12.2 (after 10)                                                 | Low-to-intermediate                                | fMRI | Story reading with comprehension                                                   |
| *Frenck-Mestre et al. | 2005  | English (also French for early bilinguals) | French (for late)                   | From birth, for early bilinguals; after 12, for late bilinguals | High                                               | fMRI | Word and sentence reading                                                          |
| Golestani et al.      | 2006  | French                                     | English                             | At 10-12                                                        | Varying                                            | fMRI | Sentence generation from single words                                              |
| Hernandez et al.      | 2015  | Spanish                                    | English                             | 3.95 (2.17)                                                     | Higher than L1                                     | fMRI | Word reading                                                                       |
| Hernandez et al.      | 2007  | Spanish for early; English for late        | English for early; Spanish for late | 4.33 (1.16), for early; 15.83 (2.95), for late                  | Higher than L1 in early; varying for late          | fMRI | Word-gender decision                                                               |
| *Hesling et al.       | 2012  | French                                     | English                             | 11 (0.5)                                                        | High for one group, moderate for the other         | fMRI | Prosodic speech comprehension                                                      |
| *Jamal et al.         | 2012  | Spanish                                    | English                             | 3.79 (2.21)                                                     | Comparable to L1                                   | fMRI | Word reading with attention to word font                                           |
| Jeong et al.          | 2015  | Japanese                                   | English                             | 11.50 (0.5)                                                     | At least intermediate                              | fMRI | Speech production                                                                  |
| Jeong et al.          | 2011  | Japanese                                   | English                             | 11.80 (0.35)                                                    | At least intermediate                              | fMRI | Speech production                                                                  |
| *Jeong et al.         | 2007a | Korean                                     | English                             | 12.3 (1.5)                                                      | Level 2 in Society for Testing English Proficiency | fMRI | Sentence comprehension as influenced by syntax                                     |
| *Jeong et al.         | 2007b | Chinese or Korean                          | English                             | 12.1 (1.2), for native                                          | Level 2 in                                         | fMRI | Sentence                                                                           |

|                  |      |                     |                     |                                                                                  |                                                              |      |                                                                               |
|------------------|------|---------------------|---------------------|----------------------------------------------------------------------------------|--------------------------------------------------------------|------|-------------------------------------------------------------------------------|
|                  |      |                     |                     | Chinese;<br>12.7 (1.0), for native Korean                                        | Society for<br>Testing English<br>Proficiency                |      | comprehension                                                                 |
| *Jiang et al.    | 2015 | Uygur               | Chinese             | Before 6, for early<br>bilinguals;<br>26.8 (range 20-31), for late<br>bilinguals | Grade 8 in<br>Advanced<br>Chinese<br>Language Test<br>Fluent | fMRI | Word reading with<br>semantic judgment                                        |
| *Kim             | 2015 | Korean              | English             | After 12                                                                         |                                                              | fMRI | Picture naming                                                                |
| Kim et al.       | 2016 | Korean              | English             | 8.7 (2.3)                                                                        | Average                                                      | fMRI | Word reading with<br>rhyming judgment                                         |
| *Klein et al.    | 1999 | Chinese             | English             | 12.1 (range: 10-14)                                                              | > 90% accuracy<br>on<br>four different<br>tasks              | PET  | Noun-verb<br>generation                                                       |
| *Kovelman et al. | 2008 | Spanish             | English             | From birth or at 4-5 (at<br>school)                                              | High (> 80%<br>accuracy in<br>screening task)                | fMRI | Semantic<br>judgment on<br>sentences with<br>classic or unusual<br>word order |
| Koyama et al.    | 2013 | Japanese or English | English or Japanese | After 12                                                                         | Not said<br>explicitly                                       | fMRI | Word reading with<br>phonological<br>matching                                 |
| *Kumar           | 2014 | Hindi               | Urdu                | Before 5                                                                         | Fluent                                                       | fMRI | Word reading with<br>attention to word<br>font                                |
| Kumar et al.     | 2010 | Hindi               | English             | Around 8-9                                                                       | Not said<br>explicitly                                       | fMRI | Phrase reading                                                                |
| Li et al.        | 2013 | Chinese             | English             | 10.64 (2.59)                                                                     | Moderate                                                     | fMRI | Picture naming<br>(plus effect of non-<br>linguistic cues)                    |
| Liu et al.       | 2010 | Chinese             | English             | Around 12                                                                        | Self-ratings:<br>5.87/10                                     | fMRI | Picture naming                                                                |
| Luke et al.      | 2002 | Chinese             | English             | After 10                                                                         | Varying (self-                                               | fMRI | Syntax and                                                                    |

|                         |      |                                     |                     |                                                          |  |                                                                           |      |                                                        |
|-------------------------|------|-------------------------------------|---------------------|----------------------------------------------------------|--|---------------------------------------------------------------------------|------|--------------------------------------------------------|
|                         |      |                                     |                     |                                                          |  | ratings:<br>5.86(0.90)/7 for<br>reading,<br>5.29(1.60)/7 for<br>speaking) |      | semantics<br>(reading)                                 |
| Meschyan &<br>Hernandez | 2006 | Spanish                             | English             | 4.33 (1.16)                                              |  | Higher than L1                                                            | fMRI | Word reading                                           |
| *Nakada et al.          | 2001 | Japanese or English                 | English or Japanese | At or after 11                                           |  | High                                                                      | fMRI | Sentence reading<br>with<br>comprehension              |
| Nosarti et al.          | 2009 | Italian or English                  | English or Italian  | English: 11 (range: 9-16);<br>Italian: 16 (range: 11-21) |  | Self-ratings:<br>75.8(12.1)/100;<br>self-ratings:<br>54.8(21.3)/100       | fMRI | Regular and<br>irregular word<br>reading               |
| *Palomar-García et al.  | 2015 | Spanish                             | Catalan             | From birth or at preschool<br>(range: 0-3)               |  | High,<br>comparable to L1                                                 | fMRI | Passive listening;<br>picture naming                   |
| Park et al.             | 2012 | Macedonian                          | English             | After 6                                                  |  | High (at least<br>upper<br>intermediate)                                  | fMRI | Lexical decision                                       |
| *Perani et al.          | 2003 | Spanish or Catalan                  | Catalan or Spanish  | At 3, in kindergarten                                    |  | High,<br>comparable to L1                                                 | fMRI | Word generation<br>(fluency)                           |
| *Perani et al.          | 1998 | Experiment 1:<br>Italian            | English             | After 10                                                 |  | High for one<br>group, low for<br>the other                               | PET  | Story listening<br>with<br>comprehension               |
|                         |      | Experiment 2:<br>Spanish or Catalan | Catalan or Spanish  | Early childhood, after 2                                 |  | High                                                                      | PET  | Story listening<br>with<br>comprehension               |
| Perani et al.           | 1996 | Italian                             | English             | After 7                                                  |  | Moderate                                                                  | PET  | Story listening<br>with<br>comprehension               |
| Reiterer et al.         | 2013 | German                              | English             | Around 10                                                |  | Varying                                                                   | fMRI | Sentence reading<br>with attention to<br>pronunciation |
| *Rodriguez-Fornells et  | 2002 | Spanish and Catalan                 |                     | In the first years of life                               |  | High                                                                      | fMRI | Lexical decision                                       |

|                     |      |                                              |                                        |                                                                                            |                      |      |  |                                                                       |
|---------------------|------|----------------------------------------------|----------------------------------------|--------------------------------------------------------------------------------------------|----------------------|------|--|-----------------------------------------------------------------------|
| al.                 |      | (no distinction between L1 and L2)           |                                        |                                                                                            |                      |      |  | only on Spanish (but not Catalan) words                               |
| *Román et al.       | 2015 | Spanish                                      | Catalan                                | At 3                                                                                       | High                 | fMRI |  | Semantic or syntactic judgment on sentences                           |
| *Saur et al.        | 2009 | French or German (both for early bilinguals) | German or French (for late bilinguals) | Before 3, for early bilinguals; after 10, for late bilinguals                              | High                 | fMRI |  | Word-order processing in sentences                                    |
| Suh et al.          | 2007 | Korean                                       | English                                | At junior high school                                                                      | Varying              | fMRI |  | Comprehension of sentences with different syntactical difficulty      |
| Sun et al.          | 2015 | Chinese or English                           | English or Chinese                     | English: at 12; Chinese: at 18                                                             | Self-ratings: 5-6/10 | fMRI |  | Word and character reading                                            |
| *Tan et al.         | 2003 | Chinese                                      | English                                | On average at 12                                                                           | Moderately high      | fMRI |  | Word reading with rhyming task                                        |
| Tatsuno & Sakai     | 2005 | Japanese                                     | English                                | At 12                                                                                      | Scholastic education | fMRI |  | Past-tense verb generation                                            |
| *van Heuven et al.  | 2008 | Dutch                                        | English                                | Mean around 11                                                                             | Self-ratings: 5-6/7  | fMRI |  | Lexical decision in presence of interlingual homographs               |
| *Videsott et al.    | 2010 | Ladin                                        | Italian                                | At 5                                                                                       | High                 | fMRI |  | Picture naming                                                        |
| Vingerhoets et al.  | 2003 | Dutch                                        | French                                 | 10.3 (0.5)                                                                                 | Varying              | fMRI |  | Word generation (fluency); picture naming; reading with comprehension |
| Waldron & Hernandez | 2013 | Spanish                                      | English                                | 3.18 (1.53; range: 1-6), for early bilinguals; 11 (3.33; range: 7-17), for late bilinguals | Not said explicitly  | fMRI |  | Past-tense verb generation                                            |

|                 |      |          |                                        |  |                 |                     |      |                                                                      |
|-----------------|------|----------|----------------------------------------|--|-----------------|---------------------|------|----------------------------------------------------------------------|
| Yang et al.     | 2011 | Chinese  | English                                |  | Around 12       | Self-ratings: 4-5/7 | fMRI | Lexical decision on words and characters                             |
| Yokoyama et al. | 2006 | Japanese | English                                |  | 11.8 (8-13)     | Varying             | fMRI | Semantic judgment on sentences with different syntactical difficulty |
| Yoon et al.     | 2006 | Korean   | Chinese (limited to character reading) |  | Late, at school | Not said explicitly | fMRI | Character reading and picture naming with semantic categorization    |

*Note.* If not otherwise indicated, the values related to age of appropriation and proficiency correspond to the mean value for the sample (in parentheses, the standard deviation, when provided).

\*: Papers included in the analysis on proficiency; AoA, Age of Appropriation; L1, First language; L2, Second language.

### **Very early bilinguals and the role of cerebellum**

A noteworthy finding for very early bilinguals concerned the specific activation of the left cerebellum. In order to make proper hypotheses on the involvement of this structure, we looked at the contrast having elicited this activation. As well as for the right cerebellum, this activation was prompted by tasks requiring overt articulation, in particular by those involving sentences. It was already demonstrated that some cerebellar districts, for instance lobule VI and crus I (resulting also from our analyses), are devoted to internal motor sequence initiation following the encoding of given phonological information. In agreement with this, lesion studies reported the development of dysarthria after left cerebellar damage (e.g., Lechtenberg and Gilman, 1978). Left-hemisphere lesions were actually observed to be associated with a wide range of language deficits, including the impairment of high-level tasks such as sentence formulation (e.g., Cook et al., 2004; Murdoch and Whelan, 2007).

The cluster of activation we observed in relation to sentence articulation might be attributed to deep sentence processing, phenomenon that probably occurs only in the bilinguals that had been exposed to both languages very early. Actually, late bilinguals are likely to execute strictly the task requirements: If merely required to read the sentences by articulating them, they will probably direct their effort to sole articulation without eliciting further sentence processing (for instance from the semantic viewpoint). This could be supported by findings demonstrating that listening to stories with respect to listening to unrelated sentences determined a greater left cerebellum involvement (e.g., Giraud et al., 2000), suggesting a role also in language comprehension. Alternatively, some other studies noticed that the cerebellar activation increased with practice, through, for instance, increased efficiency in verbal working memory (e.g., Kirschen et al., 2005; Raichle et al., 1994). In line with these findings, it may be suggested this left cerebellum activation to reflect the effect of practice and, therefore, greater language mastery.

### **L2 network in late bilinguals**

Although not resulting from the contrasts analysis, a few interesting activation clusters were observed for L2 in the group of the late bilinguals solely. Among them, the left inferior parietal lobule activation resulted to be primarily elicited by phonological tasks in an L2 that was structurally distant from L1 (e.g., in English for bilinguals with an Asian L1). As this activation spread close to the temporal-parietal junction, we hypothesized a possible a role of this region in managing unfamiliar phonemes.

Noteworthy were also the activations in the right occipital lobe. Also in this case, we checked for the contrasts having concurred to these clusters in order to make reliable assumptions on their involvement. As regards the right primary visual cortex V1, a range of diverse tasks prompted this activation, but only in the bilinguals whose L1 was not an alphabetic language, as the majority of the Indo-European languages are. In these specific cases, L1 was an Asian language, typically characterized by a logographic script. It has been demonstrated that these languages, such as Chinese, normally induce the activation of right-hemisphere regions because they entail a different (e.g., visuo-spatial) elaboration of the stimuli. Hence, in agreement with the assimilation-accommodation hypothesis originally proposed for reading (see Perfetti et al., 2007), it is likely that bilingual speakers with one of these languages as L1 engage for L2 the same functional network developed to process their native language; this could happen in spite of the fact that L2 may require different processing (see Nakada et al., 2001; Nelson et al., 2009; Tan et al., 2003).

With regard to the other two areas that resulted to be activated in the right hemisphere, meaning the middle occipital gyrus and the angular gyrus, a detailed inspection showed that they were recruited during the performance of a wide range of tasks as well, but in particular by those tapping grammar. Especially for what concerned the angular gyrus—and the inferior parietal lobule in general—, the one located in the right hemisphere was largely demonstrated to be involved in visuo-spatial working memory. This cluster however involved also the superior parietal lobule; we

can therefore interpret this finding in light of the clinical studies that observed that lesions affecting this area in either hemisphere impaired the ability to manipulate in memory the verbal information as well, while sparing mere information retrieval (e.g., Koenigs et al., 2009). Taken together, these findings suggest that the recruitment of the parietal lobules occurs to support the performance of non-automatic language tasks. As already widely discussed, it has been postulated that, starting from the age of 6, language abilities begin to be learned via explicit skills, thus resulting in lower language automatization. This is particularly tricky for grammar and phonology. In detail, late AoA is likely to affect the spontaneous application of grammatical rules, at least in terms of automatization. This can thus substantiate the additional activations required to perform grammatical tasks in a late-learned L2.
